# Supplementary material for: Anthocyanins abrogate glutamate-induced AMPK activation, oxidative stress, neuroinflammation, and neurodegeneration in postnatal rat brain
Source: PubMed Central journal article supplement (PMC5100309; doi:10.1186/s12974-016-0752-y), 2016-11-08

## Supplementary Materials

Treatment (Glu and Antho) detail *in vivo*

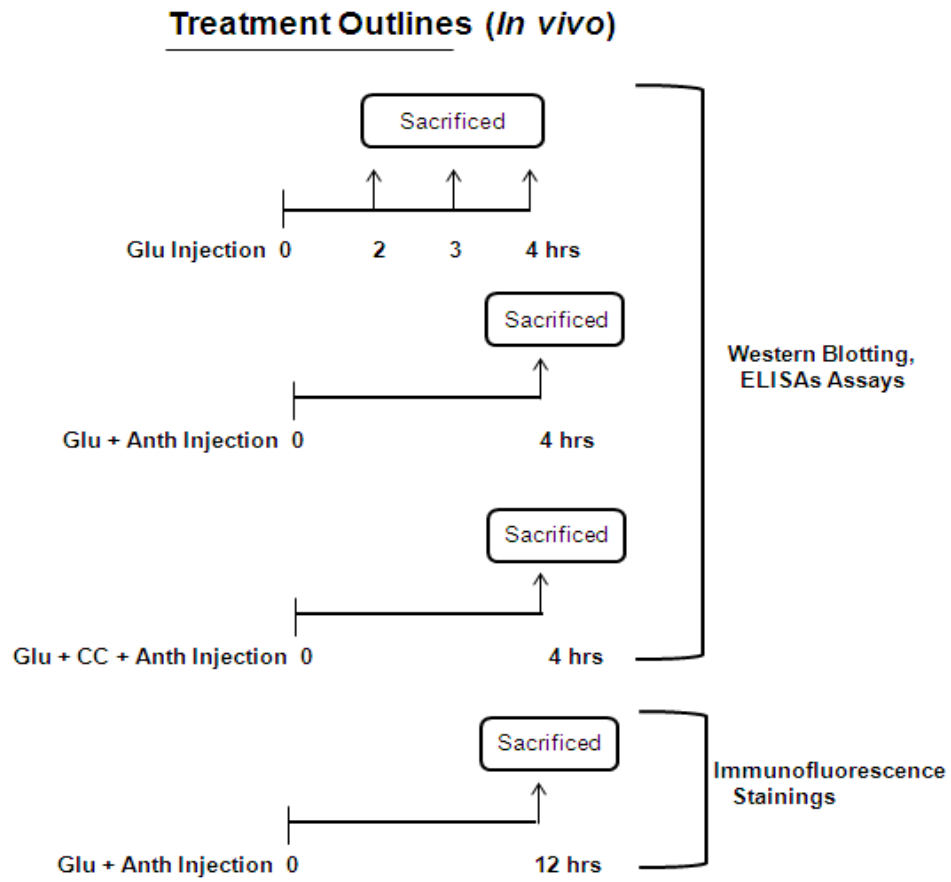

Fig. S1 (A)

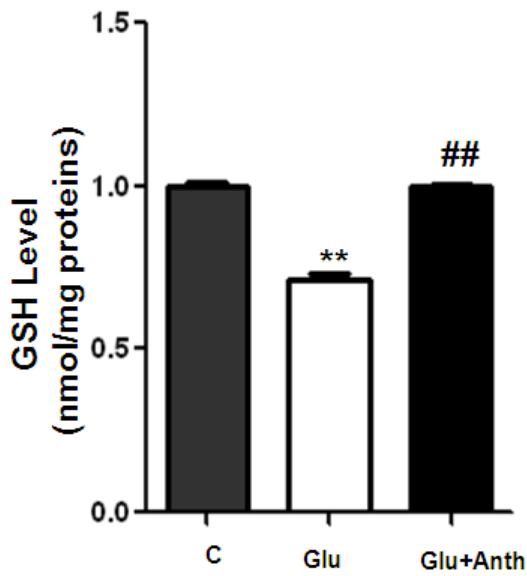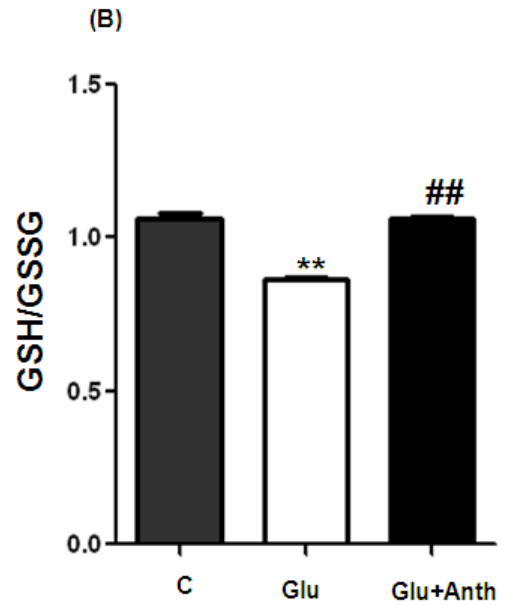

**Suppl. Fig. 1: Anthocyanin upregulated glutathione levels (GSH and GSH/GSSG ratio) against glutamate in the developing rat brain.** The histograms showing (A) the levels of total Glutathione (GSH) and (B) the ratio of GSH/GSSG in the brain homogenates of rat pups 4 h after glutamate and anthocyanin treatment. All the procedures were followed as provided by the manufacturer. These assays were performed in triplicate with the same results. Significance; \*\*  $P < 0.001$  and ##  $P < 0.001$ , respectively.

**Fig. 2d**

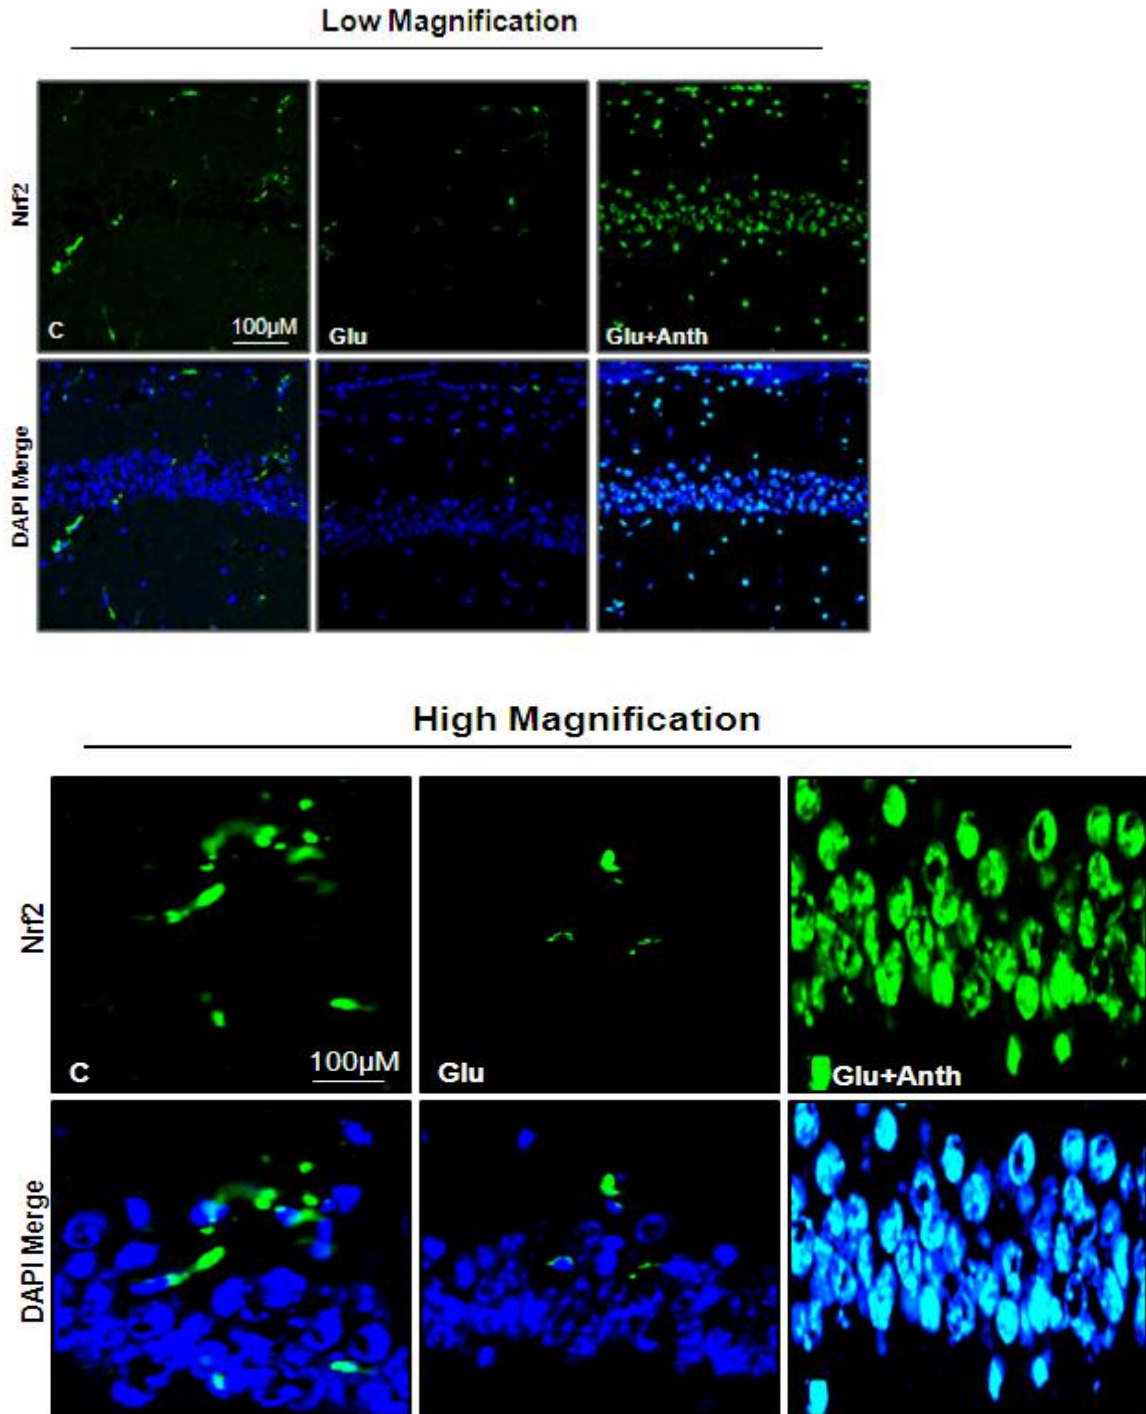

Supplement: 12974_2016_752_MOESM1_ESM.pdf [file 12974_2016_752_MOESM1_ESM.pdf]
